# Supplementary material for: Transgenic expression of fungal accessory hemicellulases in Arabidopsis thaliana triggers transcriptional patterns related to biotic stress and defense response
Source: PLoS One. 2017 Mar 2;12(3):e0173094. doi: 10.1371/journal.pone.0173094 (PMC5333852; doi:10.1371/journal.pone.0173094)
Supplement: S7 Table — (XLSX) [file pone.0173094.s012.xlsx]

## Sheet: Table S7
Table S7. Relative Fold Change of Genes Involved in Cell Wall Integrity
		Accession Number	Top						Mid						Gene Name
			AnAF54		PcGCE-7		PcGCE-13		AnAF54		PcGCE-7		PcGCE-13
			LogFC	FDR	LogFC	FDR	LogFC	FDR	LogFC	FDR	LogFC	FDR	LogFC	FDR
Cell wall remodelling	ERECTA	AT2G26330	-0.304822	0.30434	-0.172372	0.653065	-0.226794	0.557376	-0.252666	0.436252	-0.243059	0.494586	-0.21934	0.602371	ER
	G-protein	AT2G26300	-0.193197	0.445039	-0.096363	0.770826	-0.124949	0.718424	-0.32361	0.151928	-0.117605	0.695879	-0.109283	0.771388	GP ALPHA 1
		AT4G34460	0.406798	0.0597342	0.390334	0.0922829	0.387099	0.1219	0.149598	0.562823	0.269639	0.266589	0.394275	0.0912886	AGB1
		AT3G63420	0.3882	0.493119	0.258722	0.716096	0.327349	0.65222	0.492958	0.356035	0.285614	0.661294	0.495551	0.441805	GG1
		AT3G22942	0.69005	0.141722	0.48766	0.374237	0.308119	0.666828	1.11077	0.00976945	0.835761	0.0882189	0.848154	0.0958178	AGG2
CWDE Inhibitors	Polygalacturonase-inhibiting proteins (PGIP)	AT5G06860	#N/A	#N/A	#N/A	#N/A	#N/A	#N/A	#N/A	#N/A	#N/A	#N/A	#N/A	#N/A	#N/A
		AT5G06870	-0.77053	0.153662	0.177432	0.832913	0.262798	0.754002	-1.22226	0.0125095	0.11769	0.88586	0.104151	0.921573	PGIP2
Reinforcement of Cell Wall	Callose Synthase	AT4G03550	0.679484	0.019309	0.292078	0.452175	0.359779	0.366788	0.445539	0.162504	0.386272	0.268077	0.40141	0.294745	GSL05
	Lignin Deposition	At3g49120	0.853912	0.00123162	0.893812	0.000850611	0.998516	0.00020654	1.25542	4.38317e-07	0.956668	0.000231546	1.46504	2.8738e-09	PRXCB
		At3g49110	0.568342	0.442094	-0.0518853	0.964887	-0.363237	0.727282	-0.906152	0.302416	-0.701267	0.481165	-0.0233746	0.991137	PRXCA
		At3g32980	-0.586144	0.489058	-0.105951	0.931549	-0.244307	0.846095	-1.92509	0.0563518	-0.661758	0.577808	-0.72346	0.57811	N/A
		At4g08770	#N/A	#N/A	#N/A	#N/A	#N/A	#N/A	#N/A	#N/A	#N/A	#N/A	#N/A	#N/A	#N/A
		At4g08780	#N/A	#N/A	#N/A	#N/A	#N/A	#N/A	#N/A	#N/A	#N/A	#N/A	#N/A	#N/A	#N/A
		At2g38380	-2.12286	0.014303	-0.879973	0.381893	-1.2739	0.218942	-0.370663	0.873864	0.99235	0.595895	-0.245582	0.944072	N/A
		At2g38390	#N/A	#N/A	#N/A	#N/A	#N/A	#N/A	#N/A	#N/A	#N/A	#N/A	#N/A	#N/A	#N/A
		At5g06730	2.30452	2.33573e-07	1.1455	0.0449602	1.08323	0.0946618	1.28984	0.143129	0.752454	0.523902	0.904907	0.447255	N/A
		At5g06720	3.27731	3.84751e-12	1.89754	0.000139532	1.8694	0.000282479	1.94281	0.000163032	1.80275	0.000618162	1.35988	0.0211473	PA2
		At5g19880	#N/A	#N/A	#N/A	#N/A	#N/A	#N/A	#N/A	#N/A	#N/A	#N/A	#N/A	#N/A	#N/A
		At5g19890	#N/A	#N/A	#N/A	#N/A	#N/A	#N/A	#N/A	#N/A	#N/A	#N/A	#N/A	#N/A	#N/A
		At5g58390	#N/A	#N/A	#N/A	#N/A	#N/A	#N/A	#N/A	#N/A	#N/A	#N/A	#N/A	#N/A	#N/A
		At5g58400	#N/A	#N/A	#N/A	#N/A	#N/A	#N/A	#N/A	#N/A	#N/A	#N/A	#N/A	#N/A	#N/A
		At5g05340	#N/A	#N/A	#N/A	#N/A	#N/A	#N/A	#N/A	#N/A	#N/A	#N/A	#N/A	#N/A	#N/A
		At1g14540	#N/A	#N/A	#N/A	#N/A	#N/A	#N/A	#N/A	#N/A	#N/A	#N/A	#N/A	#N/A	#N/A
		At1g14550	#N/A	#N/A	#N/A	#N/A	#N/A	#N/A	#N/A	#N/A	#N/A	#N/A	#N/A	#N/A	#N/A
		At5g66390	-0.896279	0.0624729	-0.76409	0.140779	-0.557473	0.370544	2.29355	0.505491	5.12548e-15	1	3.8637	0.215442	N/A
		At3g50990	#N/A	#N/A	#N/A	#N/A	#N/A	#N/A	#N/A	#N/A	#N/A	#N/A	#N/A	#N/A	#N/A
		At4g36430	#N/A	#N/A	#N/A	#N/A	#N/A	#N/A	#N/A	#N/A	#N/A	#N/A	#N/A	#N/A	#N/A
		At2g18140	#N/A	#N/A	#N/A	#N/A	#N/A	#N/A	#N/A	#N/A	#N/A	#N/A	#N/A	#N/A	#N/A
		At2g18150	#N/A	#N/A	#N/A	#N/A	#N/A	#N/A	#N/A	#N/A	#N/A	#N/A	#N/A	#N/A	#N/A
		At1g44970	#N/A	#N/A	#N/A	#N/A	#N/A	#N/A	#N/A	#N/A	#N/A	#N/A	#N/A	#N/A	#N/A
		At2g35380	#N/A	#N/A	#N/A	#N/A	#N/A	#N/A	#N/A	#N/A	#N/A	#N/A	#N/A	#N/A	#N/A
		At2g22420	0.0512874	0.923247	0.592195	0.102123	0.187512	0.741247	-0.415039	0.30846	0.37311	0.380974	0.190063	0.751828	N/A
		At1g49570	#N/A	#N/A	#N/A	#N/A	#N/A	#N/A	#N/A	#N/A	#N/A	#N/A	#N/A	#N/A	#N/A
		At1g68850	#N/A	#N/A	#N/A	#N/A	#N/A	#N/A	#N/A	#N/A	#N/A	#N/A	#N/A	#N/A	#N/A
		At4g16270	#N/A	#N/A	#N/A	#N/A	#N/A	#N/A	#N/A	#N/A	#N/A	#N/A	#N/A	#N/A	#N/A
		At1g71695	-0.582383	0.0104398	0.144085	0.656888	-0.00609635	0.990624	-0.44355	0.0956249	-0.129606	0.723724	-0.177667	0.657629	N/A
		At5g42180	0.0182348	0.978524	-0.166777	0.809002	0.175821	0.812377	0.00556568	0.993891	0.404187	0.444513	-0.327852	0.615269	PER64
		At5g51890	0.141381	0.628985	-0.142943	0.670223	-0.0267778	0.955281	1.37671	5.14447e-05	1.44542	2.16008e-05	0.50343	0.349876	N/A
		At4g33420	0.702467	0.363263	1.05065	0.172332	1.28975	0.0982421	1.32495	0.0612561	1.43488	0.0460575	0.969985	0.270673	N/A
		At4g33870	#N/A	#N/A	#N/A	#N/A	#N/A	#N/A	#N/A	#N/A	#N/A	#N/A	#N/A	#N/A	#N/A
		At5g64100	#N/A	#N/A	#N/A	#N/A	#N/A	#N/A	#N/A	#N/A	#N/A	#N/A	#N/A	#N/A	#N/A
		At5g64110	#N/A	#N/A	#N/A	#N/A	#N/A	#N/A	#N/A	#N/A	#N/A	#N/A	#N/A	#N/A	#N/A
		At5g64120	2.29613	7.37234e-05	1.97765	0.00104619	1.94587	0.00193124	1.05206	0.115512	2.14164	0.000319217	2.14388	0.000411827	N/A
		At5g39580	5.77055	4.18394e-11	4.32144	7.40263e-07	4.4484	6.05813e-07	1.88219	0.144789	2.13108	0.100997	2.7449	0.0231424	N/A
		At2g41480	2.2966	0.000150702	1.31399	0.0889137	1.36826	0.10778	0.619672	0.322018	0.132099	0.890967	-0.377019	0.697877	N/A
		At1g77100	#N/A	#N/A	#N/A	#N/A	#N/A	#N/A	#N/A	#N/A	#N/A	#N/A	#N/A	#N/A	#N/A
		At4g25980	#N/A	#N/A	#N/A	#N/A	#N/A	#N/A	#N/A	#N/A	#N/A	#N/A	#N/A	#N/A	#N/A
		At5g17820	#N/A	#N/A	#N/A	#N/A	#N/A	#N/A	#N/A	#N/A	#N/A	#N/A	#N/A	#N/A	#N/A
		At3g03670	#N/A	#N/A	#N/A	#N/A	#N/A	#N/A	#N/A	#N/A	#N/A	#N/A	#N/A	#N/A	#N/A
		At1g34510	#N/A	#N/A	#N/A	#N/A	#N/A	#N/A	#N/A	#N/A	#N/A	#N/A	#N/A	#N/A	#N/A
		At4g26010	#N/A	#N/A	#N/A	#N/A	#N/A	#N/A	#N/A	#N/A	#N/A	#N/A	#N/A	#N/A	#N/A
		At5g22410	#N/A	#N/A	#N/A	#N/A	#N/A	#N/A	#N/A	#N/A	#N/A	#N/A	#N/A	#N/A	#N/A
		At2g43480	#N/A	#N/A	#N/A	#N/A	#N/A	#N/A	#N/A	#N/A	#N/A	#N/A	#N/A	#N/A	#N/A
		At5g24070	#N/A	#N/A	#N/A	#N/A	#N/A	#N/A	#N/A	#N/A	#N/A	#N/A	#N/A	#N/A	#N/A
		At3g21770	0.628351	0.121925	0.435321	0.346151	0.267619	0.673373	0.87261	0.0206282	0.561182	0.227391	0.591441	0.214486	N/A
		At1g05260	1.68475	0.173374	0.322283	0.872006	0.298447	0.890286	1.40281	0.273337	0.205631	0.916462	-0.687662	0.727989	RCI3
		At4g11290	#N/A	#N/A	#N/A	#N/A	#N/A	#N/A	#N/A	#N/A	#N/A	#N/A	#N/A	#N/A	#N/A
		At1g05240	#N/A	#N/A	#N/A	#N/A	#N/A	#N/A	#N/A	#N/A	#N/A	#N/A	#N/A	#N/A	#N/A
		At1g05250	#N/A	#N/A	#N/A	#N/A	#N/A	#N/A	#N/A	#N/A	#N/A	#N/A	#N/A	#N/A	#N/A
		At3g01190	#N/A	#N/A	#N/A	#N/A	#N/A	#N/A	#N/A	#N/A	#N/A	#N/A	#N/A	#N/A	#N/A
		At5g15180	-0.585942	0.310947	-0.504254	0.422987	0.216187	0.793572	-0.980433	0.0737661	-0.723025	0.235998	-0.735738	0.256468	N/A
		At2g39040	#N/A	#N/A	#N/A	#N/A	#N/A	#N/A	#N/A	#N/A	#N/A	#N/A	#N/A	#N/A	#N/A
		At4g37520	-0.0516109	0.955165	-1.22844	0.0497831	-0.399281	0.661658	-1.31974	0.0166158	-0.878092	0.155825	-0.471681	0.573243	N/A
		At4g37530	0.493743	0.564629	0.107053	0.931671	0.657216	0.488374	-0.452843	0.355083	-0.26467	0.655444	0.0262306	0.978892	N/A
		At5g67400	#N/A	#N/A	#N/A	#N/A	#N/A	#N/A	#N/A	#N/A	#N/A	#N/A	#N/A	#N/A	#N/A
		At3g49960	#N/A	#N/A	#N/A	#N/A	#N/A	#N/A	#N/A	#N/A	#N/A	#N/A	#N/A	#N/A	#N/A
		At4g30170	#N/A	#N/A	#N/A	#N/A	#N/A	#N/A	#N/A	#N/A	#N/A	#N/A	#N/A	#N/A	#N/A
		At2g18980	#N/A	#N/A	#N/A	#N/A	#N/A	#N/A	#N/A	#N/A	#N/A	#N/A	#N/A	#N/A	#N/A
		At5g14130	#N/A	#N/A	#N/A	#N/A	#N/A	#N/A	#N/A	#N/A	#N/A	#N/A	#N/A	#N/A	#N/A
		At5g40150	0.10294	0.908133	0.140701	0.893262	0.000671123	1	-0.03352	0.971908	-0.059991	0.955309	-0.226895	0.846821	N/A
		At3g28200	1.19217	0.0107503	0.244623	0.742533	0.420996	0.549316	0.813797	0.110163	0.17148	0.818233	0.131388	0.895553	N/A
		At5g47000	#N/A	#N/A	#N/A	#N/A	#N/A	#N/A	#N/A	#N/A	#N/A	#N/A	#N/A	#N/A	#N/A
		At4g17690	#N/A	#N/A	#N/A	#N/A	#N/A	#N/A	#N/A	#N/A	#N/A	#N/A	#N/A	#N/A	#N/A
		At1g24110	#N/A	#N/A	#N/A	#N/A	#N/A	#N/A	#N/A	#N/A	#N/A	#N/A	#N/A	#N/A	#N/A
		At2g34060	-0.830504	0.0618929	-0.55936	0.233486	-0.527024	0.339556	-0.708098	0.229246	-0.576542	0.384537	-0.904874	0.155506	N/A
		At3g17070	0.0265741	0.96536	0.0416949	0.950975	0.148488	0.823875	-0.306006	0.482325	-0.721913	0.0680169	-0.58128	0.185417	N/A
		At1g30870	#N/A	#N/A	#N/A	#N/A	#N/A	#N/A	#N/A	#N/A	#N/A	#N/A	#N/A	#N/A	#N/A
		At2g24800	#N/A	#N/A	#N/A	#N/A	#N/A	#N/A	#N/A	#N/A	#N/A	#N/A	#N/A	#N/A	#N/A
		At4g31760	#N/A	#N/A	#N/A	#N/A	#N/A	#N/A	#N/A	#N/A	#N/A	#N/A	#N/A	#N/A	#N/A
		At4g21960	0.31493	0.317735	-0.364095	0.282044	0.00315171	0.996077	0.219836	0.515368	0.128296	0.751817	0.241279	0.559691	PRXR1
		At2g37130	-0.84589	0.264156	-1.96102	0.00483606	-0.142355	0.91015	-4.38316	2.74876e-14	-2.19014	0.00011978	-0.993219	0.170386	N/A
		At1g34330	#N/A	#N/A	#N/A	#N/A	#N/A	#N/A	#N/A	#N/A	#N/A	#N/A	#N/A	#N/A	#N/A
		At3g42570	#N/A	#N/A	#N/A	#N/A	#N/A	#N/A	#N/A	#N/A	#N/A	#N/A	#N/A	#N/A	#N/A
	Hydroxyproline-rich glycoprotein (HRGP)/Extensin	AT1G76930	2.59653	0.026308	1.25973	0.39755	0.97354	0.578329	0.207327	0.901179	1.0085	0.475069	1.61437	0.243233	EXT4
	PME	AT1G02810	1.57734	0.220403	1.28321	0.390017	0.816465	0.652874	0.347919	0.851254	0.972322	0.560781	0.620979	0.785125	N/A
		AT1G05310	0.117266	0.765667	-0.364133	0.298684	0.249101	0.551147	-0.558296	0.0570269	-0.141377	0.732423	-0.310876	0.42882	N/A
		AT1G11580	0.135821	0.687791	-0.178524	0.624627	-0.245523	0.50666	-0.260484	0.361162	-0.349389	0.218337	-0.686038	0.0055046	PMEPCRA
		AT1G11590	#N/A	#N/A	#N/A	#N/A	#N/A	#N/A	#N/A	#N/A	#N/A	#N/A	#N/A	#N/A	#N/A
		AT1G23200	1.27759	0.206741	0.0968963	0.957434	0.664561	0.653099	-0.0119026	0.993721	-0.348717	0.793223	0.0879774	0.964248	N/A
		AT1G53830	#N/A	#N/A	#N/A	#N/A	#N/A	#N/A	#N/A	#N/A	#N/A	#N/A	#N/A	#N/A	#N/A
		AT1G69940	#N/A	#N/A	#N/A	#N/A	#N/A	#N/A	#N/A	#N/A	#N/A	#N/A	#N/A	#N/A	#N/A
		AT2G19150	#N/A	#N/A	#N/A	#N/A	#N/A	#N/A	#N/A	#N/A	#N/A	#N/A	#N/A	#N/A	#N/A
		AT2G21610	#N/A	#N/A	#N/A	#N/A	#N/A	#N/A	#N/A	#N/A	#N/A	#N/A	#N/A	#N/A	#N/A
		AT2G26440	2.88729	7.51248e-20	2.18712	8.22502e-12	2.26319	2.96729e-12	4.05089	1.21082e-35	2.65709	1.68224e-16	3.41083	3.66205e-26	N/A
		AT2G26450	#N/A	#N/A	#N/A	#N/A	#N/A	#N/A	#N/A	#N/A	#N/A	#N/A	#N/A	#N/A	#N/A
		AT2G36700	#N/A	#N/A	#N/A	#N/A	#N/A	#N/A	#N/A	#N/A	#N/A	#N/A	#N/A	#N/A	#N/A
		AT2G36710	#N/A	#N/A	#N/A	#N/A	#N/A	#N/A	#N/A	#N/A	#N/A	#N/A	#N/A	#N/A	#N/A
		AT2G43050	0.33189	0.679538	-0.551563	0.505279	0.120777	0.919549	-0.499941	0.48992	-0.0281579	0.980014	-0.790232	0.311279	ATPMEPCRD
		AT2G45220	0.0678318	0.91636	-0.89788	0.0495446	0.18283	0.805921	-0.699006	0.117055	-0.0527333	0.943327	-0.694686	0.171327	N/A
		At2g47030	#N/A	#N/A	#N/A	#N/A	#N/A	#N/A	#N/A	#N/A	#N/A	#N/A	#N/A	#N/A	#N/A
		AT2G47550	#N/A	#N/A	#N/A	#N/A	#N/A	#N/A	#N/A	#N/A	#N/A	#N/A	#N/A	#N/A	#N/A
		AT3G05610	#N/A	#N/A	#N/A	#N/A	#N/A	#N/A	#N/A	#N/A	#N/A	#N/A	#N/A	#N/A	#N/A
		AT3G05620	0.149251	0.817312	-0.0421938	0.960046	0.0596858	0.949858	-0.121298	0.858524	-0.759204	0.181726	-0.132321	0.885272	N/A
		AT3G06830	-0.498694	0.525464	-0.416078	0.631485	-0.0308483	0.983149	-0.357918	0.63346	-0.957961	0.169058	-0.302642	0.76853	N/A
		AT3G10710	#N/A	#N/A	#N/A	#N/A	#N/A	#N/A	#N/A	#N/A	#N/A	#N/A	#N/A	#N/A	#N/A
		AT3G10720	2.3223	3.36923e-05	1.63684	0.0068886	1.301	0.0549386	0.925451	0.166364	0.87393	0.219888	0.644189	0.462426	N/A
		AT3G14300	#N/A	#N/A	#N/A	#N/A	#N/A	#N/A	#N/A	#N/A	#N/A	#N/A	#N/A	#N/A	#N/A
		AT3G14310	-0.171276	0.819419	0.00931481	0.993552	-0.0955796	0.927818	-0.379145	0.563331	0.0682115	0.940928	0.0490984	0.967422	PME3
		AT3G24130	#N/A	#N/A	#N/A	#N/A	#N/A	#N/A	#N/A	#N/A	#N/A	#N/A	#N/A	#N/A	#N/A
		At3g27980	#N/A	#N/A	#N/A	#N/A	#N/A	#N/A	#N/A	#N/A	#N/A	#N/A	#N/A	#N/A	#N/A
		AT3G29090	-0.138368	0.681779	-0.141948	0.705088	-0.194472	0.617422	0.0852151	0.810476	-0.223376	0.498843	-0.0793231	0.873052	PME31
		AT3G43270	-0.265385	0.586192	-0.464383	0.32981	-0.16902	0.800542	-0.304658	0.54603	0.195927	0.737564	-0.214533	0.76404	N/A
		AT3G47400	0.37854	0.385288	0.171825	0.767173	0.114053	0.871503	0.82697	0.308286	0.75452	0.410451	0.693877	0.500021	N/A
		AT3G49220	0.506044	0.384334	0.531885	0.409973	0.349681	0.654656	0.750496	0.163576	1.18578	0.0191435	0.255018	0.777888	N/A
		AT3G59010	-0.0431979	0.903947	0.23514	0.447463	0.453737	0.0985726	-0.117756	0.703801	0.623727	0.00536924	0.127265	0.75407	PME61
		AT3G60730	#N/A	#N/A	#N/A	#N/A	#N/A	#N/A	#N/A	#N/A	#N/A	#N/A	#N/A	#N/A	#N/A
		AT3G62170	#N/A	#N/A	#N/A	#N/A	#N/A	#N/A	#N/A	#N/A	#N/A	#N/A	#N/A	#N/A	#N/A
		AT4G00190	#N/A	#N/A	#N/A	#N/A	#N/A	#N/A	#N/A	#N/A	#N/A	#N/A	#N/A	#N/A	#N/A
		AT4G02300	#N/A	#N/A	#N/A	#N/A	#N/A	#N/A	#N/A	#N/A	#N/A	#N/A	#N/A	#N/A	#N/A
		AT4G02320	#N/A	#N/A	#N/A	#N/A	#N/A	#N/A	#N/A	#N/A	#N/A	#N/A	#N/A	#N/A	#N/A
		AT4G02330	3.75659	0.0012516	3.2652	0.00708698	2.93367	0.0228898	2.89936	0.0182035	2.76162	0.028788	2.60606	0.0535401	ATPMEPCRB
		AT4G03930	#N/A	#N/A	#N/A	#N/A	#N/A	#N/A	#N/A	#N/A	#N/A	#N/A	#N/A	#N/A	#N/A
		AT4G15980	#N/A	#N/A	#N/A	#N/A	#N/A	#N/A	#N/A	#N/A	#N/A	#N/A	#N/A	#N/A	#N/A
		AT4G33220	0.0330636	0.925372	-0.296096	0.290475	-0.103369	0.795885	0.0772137	0.841739	-0.144665	0.709381	-0.229864	0.566901	PME44
		AT4G33230	#N/A	#N/A	#N/A	#N/A	#N/A	#N/A	#N/A	#N/A	#N/A	#N/A	#N/A	#N/A	#N/A
		AT5G04960	#N/A	#N/A	#N/A	#N/A	#N/A	#N/A	#N/A	#N/A	#N/A	#N/A	#N/A	#N/A	#N/A
		AT5G04970	1.62156	0.000832702	1.19363	0.026878	1.38009	0.0123641	0.0460612	0.966639	1.02524	0.151071	0.570882	0.561022	N/A
		AT5G07410	#N/A	#N/A	#N/A	#N/A	#N/A	#N/A	#N/A	#N/A	#N/A	#N/A	#N/A	#N/A	#N/A
		AT5G07420	#N/A	#N/A	#N/A	#N/A	#N/A	#N/A	#N/A	#N/A	#N/A	#N/A	#N/A	#N/A	#N/A
		AT5G07430	#N/A	#N/A	#N/A	#N/A	#N/A	#N/A	#N/A	#N/A	#N/A	#N/A	#N/A	#N/A	#N/A
		AT5G09760	0.38317	0.281213	0.751845	0.0191982	0.470261	0.243148	-0.0180459	0.971866	0.35133	0.371418	0.230651	0.651893	N/A
		AT5G19730	-0.839809	0.478871	-0.631718	0.655303	-0.912915	0.520249	-0.453828	0.758309	-0.0413226	0.983266	-0.766508	0.658394	N/A
		At5g20860	0.418716	0.763719	-2.80893	0.0821525	0.300781	0.874042	-0.297608	0.692728	-0.692387	0.340617	-0.0428161	0.974201	N/A
		AT5G49180	#N/A	#N/A	#N/A	#N/A	#N/A	#N/A	#N/A	#N/A	#N/A	#N/A	#N/A	#N/A	#N/A
		AT5G51490	#N/A	#N/A	#N/A	#N/A	#N/A	#N/A	#N/A	#N/A	#N/A	#N/A	#N/A	#N/A	#N/A
		AT5G51500	#N/A	#N/A	#N/A	#N/A	#N/A	#N/A	#N/A	#N/A	#N/A	#N/A	#N/A	#N/A	#N/A
		AT5G53370	0.231846	0.408302	0.145566	0.683262	0.278526	0.390734	0.000116215	0.999826	0.38272	0.140207	0.00785188	0.990814	PMEPCRF
		AT5G55590	#N/A	#N/A	#N/A	#N/A	#N/A	#N/A	#N/A	#N/A	#N/A	#N/A	#N/A	#N/A	#N/A
		AT5G61680	#N/A	#N/A	#N/A	#N/A	#N/A	#N/A	#N/A	#N/A	#N/A	#N/A	#N/A	#N/A	#N/A
		AT5G64640	0.108278	0.8243	-0.438868	0.291847	-0.35271	0.472863	-0.13965	0.790099	-0.455124	0.325512	-0.357417	0.510834	N/A
		AT1G53840	0.289782	0.122529	0.128289	0.61341	0.111758	0.699474	-0.439188	0.0149882	-0.114728	0.655669	-0.218464	0.375507	PME1
		AT2G47040	-0.342589	0.640838	0.100249	0.915344	-0.102433	0.924742	1.13835	0.0159049	0.0680158	0.941763	0.0838401	0.943579	VGD1
	Pectin methyl esterase inhibitor (PMEI)	AT1G48020	#N/A	#N/A	#N/A	#N/A	#N/A	#N/A	#N/A	#N/A	#N/A	#N/A	#N/A	#N/A	#N/A
		AT3G17220	#N/A	#N/A	#N/A	#N/A	#N/A	#N/A	#N/A	#N/A	#N/A	#N/A	#N/A	#N/A	#N/A
		AT4G25250	#N/A	#N/A	#N/A	#N/A	#N/A	#N/A	#N/A	#N/A	#N/A	#N/A	#N/A	#N/A	#N/A
		AT2G31430	#N/A	#N/A	#N/A	#N/A	#N/A	#N/A	#N/A	#N/A	#N/A	#N/A	#N/A	#N/A	#N/A
		AT1G48020	#N/A	#N/A	#N/A	#N/A	#N/A	#N/A	#N/A	#N/A	#N/A	#N/A	#N/A	#N/A	#N/A
Cell wall Synthesis Regulation	MYB46	AT5G12870	1.16022	0.0105283	0.491278	0.416243	1.02741	0.0470743	0.146592	0.8193	0.720745	0.141414	0.0625345	0.95132	MYB46
	THESEUS1	AT5G54380	1.45847	0.0442848	1.06243	0.206	0.934398	0.322025	1.52014	0.0349086	1.86976	0.00850342	1.50051	0.0568281	THE1
	RWA	AT5G46340	0.98641	0.00675824	-0.108325	0.871432	0.577019	0.226172	0.404708	0.345049	0.797766	0.0380472	0.199648	0.762644	RWA1
		AT3G06550	0.536035	0.0738784	0.473735	0.154886	0.339615	0.393179	0.240002	0.497327	0.34578	0.324389	0.0534189	0.935107	RWA2
		AT2G34410	1.01909	0.00170455	0.250654	0.611554	0.636014	0.120413	0.466778	0.208844	0.70914	0.0435825	0.331351	0.498399	RWA3
		AT1G29890	0.600176	0.0137043	0.0360033	0.937643	0.307514	0.361649	0.164168	0.595871	0.261264	0.385743	0.0101602	0.987171	RWA4
